## Education

# Simulation of Molecular Data under Diverse Evolutionary Scenarios

Miguel Arenas<sup>1,2\*</sup>

**1** Computational and Molecular Population Genetics Lab (CMPG), Institute of Ecology and Evolution, University of Bern, Bern, Switzerland, **2** Swiss Institute of Bioinformatics, Lausanne, Switzerland

This is an original *PLoS Computational Biology* tutorial.

## Introduction

This study is intended for evolutionary biologists interested in strategies for the simulation of molecular data under diverse evolutionary scenarios. It begins with a brief background on simulation approaches and describes some of the most important simulators developed to date. Then, several practical examples for simulating particular scenarios are presented, and finally, details are given on a variety of relevant applications of simulated data. Overall, this study provides a practical guide for applying simulation techniques to real world problems in molecular evolution.

## The Importance of Computer Simulations in Molecular Evolution

A commonly used methodology to mimic the processes that occur in the real world is to perform computer simulations [1]. Computer simulations allow us to understand which patterns may dramatically alter a particular system and can be used to study complex processes, including those that are analytically intractable. Furthermore, the simulation of multiple replicates with stochasticity may provide the variability required to study numerous processes, such as those often found in evolution. In molecular evolution, the simulation of genetic data has been commonly used for hypothesis testing (e.g., [2]), to compare and verify analytical methods or tools (e.g., [3–5]), to analyze interactions among evolutionary processes (e.g., [6]), and even to estimate evolutionary parameters (e.g., [7]). Consequently, a wide variety of tools have been developed to simulate sequence data under different substitution models of evolution, but also under different evolutionary processes such as selection, recombination, demography, population structure, and migration. In recent years, new programs have

been developed to handle very complex scenarios (e.g., [8,9]) and efficient algorithms have been incorporated in order to accommodate large datasets in response to the increasing amount of genome-wide data (e.g., [10]). Thus, the importance of simulations continues to grow in order to deal with these new challenges.

## Approaches for the Simulation of Molecular Data

After the simulation of evolutionary histories (see Box 1), or when just a rooted tree or network is given, a sequence assigned to the most recent common ancestor (MRCA, or grand MRCA [GMRCAs] in the case of networks) can be evolved along branches according to a substitution model of evolution, in order to simulate sequences for all internal and terminal nodes (see an example in Figure 1). A common procedure consists of applying continuous-time Markov models defined by  $4 \times 4$ ,  $20 \times 20$ , and  $61 \times 61$  matrices of substitution rates for nucleotide, amino acid, and codon (note that stop codons are ignored) data, respectively (details in [11]). This methodology is very flexible and allows for heterogeneous evolution where different sites and branches can be evolved under different substitution models (e.g., [12]). These aspects suggest in practice two important considerations. Firstly, simulations of nucleotide sequences are much faster than simulations of coding or amino acid sequences due to the dimension of the substitution matrices. Secondly, a large number of branches (derived from a large number of taxa or recombination events) leads to

slower simulations due to the need to recalculate the matrix for each branch.

## Main Software Implementations

A number of programs have been developed to simulate nucleotide, codon, and amino acid sequences evolution. Although several studies have already reviewed these software tools (e.g., [13–17]), such revisions quickly become obsolete due to the emergence of new simulators, as noted in [14]. Table 1 shows an updated list of user-friendly and commonly used programs available to date. Next, the most interesting software from a practical perspective is briefly described.

When attempting to simulate a complex evolutionary scenario, several programs developed under the forward-time approach may be useful (see Table 1). *GenomePop* [18] and *SFS\_CODE* [19] seem the most comprehensive tools with implementations of population structure, demographic particularities, recombination, and selection, but they do not allow simulations under amino acid substitution models. The programs *SPLATCHE2* [9] and *AQUASPLATCHE* [20] are able to simulate nucleotide data under spatially (using land or freshwater maps, respectively) and temporally explicit demographic models. A disadvantage of these programs is that only two DNA substitution models are available, note that other programs such as *SFS\_CODE* or *SimuPop* [21] implement all DNA substitution models (see Table 1), which may be problematic when trying to mimic genome-wide data (see [22]).

If our target scenario can be represented by the coalescent, a variety of coalescent-

**Citation:** Arenas M (2012) Simulation of Molecular Data under Diverse Evolutionary Scenarios. *PLoS Comput Biol* 8(5): e1002495. doi:10.1371/journal.pcbi.1002495

**Editor:** Fran Lewitter, Whitehead Institute, United States of America

**Published:** May 31, 2012

**Copyright:** © 2012 Miguel Arenas. This is an open-access article distributed under the terms of the Creative Commons Attribution License, which permits unrestricted use, distribution, and reproduction in any medium, provided the original author and source are credited.

**Funding:** The author received no specific funding for this article.

**Competing Interests:** The author has declared that no competing interests exist.

\* E-mail: miguel.arenasbusto@iee.unibe.ch

## Box 1. Simulation of Evolutionary Histories

There are two main approaches commonly used to simulate evolutionary histories in population genetics: the forward in time (forward-time) and the coalescent (backward-time). Here I describe the main particularities of these approaches, considering goals and limitations for the simulation of diverse evolutionary scenarios.

The forward-time approach simulates the evolutionary history of an entire population from the past to the present and allows the success of a lineage to be a function of the genotype (see reviews, [13,14,80]). Thus, these simulations consider all ancestral information and therefore can be useful to fully study the subsequent evolutionary process of the population, including gene-gene interactions, mating systems, complex migration models (such as sex biased dispersal or long-distance dispersal), or complex selection (e.g., [42,81,82]); beginners may explore these basic concepts using educational simulations [83,84]. Unfortunately, because the whole population history is simulated, forward simulations require generally extensive computational cost, although recently significant improvements have been achieved in this concern (e.g., [85]).

On the other hand, the coalescent approach describes a backwards in time genealogical process of a sample of genes to a single ancestral copy (see reviews [86,87]). The coalescent allows the simulation of a limited set of scenarios, namely population size changes (e.g., [88]), population structure and migration (e.g., [89]), recombination (e.g., [90]), and selection (e.g., [91]). A key aspect of the coalescent is that the history of the whole population is not required (so it is not actually simulated) and, consequently, it is generally computationally faster than the forward-time approach. It is important to remember, however, that the efficiency of forward-time simulations is irrespective of the amount of recombination or selection, in contrast to coalescent simulations that are highly sensitive to such processes.

Coalescent and forward-time approaches can be considered complementary [13]. In fact, recently two new methods have incorporated both approaches for fast simulations of complex scenarios [9,33]. In conclusion, one should keep in mind that the choice of the simulation approach may depend on the complexity of the target scenario, as well as on the required computational cost for the simulation.

based programs are able to simulate nucleotide data (see Table 1). Nevertheless, only *CodonRecSim* [23], *Recodon* [24], and *NetRecodon* [8] can simulate coding sequences in the presence of recombination. The first two of these programs force recombination breakpoints to occur between codons while *NetRecodon* does not (see [8]). On the other hand, *fastsimcoal* [10], *Recodon*, and *NetRecodon* allow simulations with sampling at different times, which can be very interesting for the joint analysis of ancient and modern DNA [25].

When a phylogenetic history (one or several trees) is given, numerous programs exist to directly simulate sequences along such history (see Table 1, phylogenetic class). One of the most applied programs is *Seq-Gen* [26], which implements several nucleotide and amino acid substitution models. The program *indel-Seq-Gen 2.0* [27] extended *Seq-Gen* to include diverse indel (insertion and deletion) models. Almost at the same time as *Seq-Gen*, the program *EVOLVER* (from the *PAML* package [28]) was released, which additionally allowed the simulation of coding

data. Recently, *INDELible* [12] and *PhyloSim* [29] implemented all those capabilities, and in addition they included codon models where dN/dS (nonsynonymous/synonymous rate ratio) may vary across sites and/or branches. *INDELible* is very user-friendly but *PhyloSim* was implemented in R (language for statistical computing, [30]) and requires some programming knowledge.

### Practical Examples

In this section I outline five hypothetical practical examples, of the fast simulation of genetic sequences under particular evolutionary scenarios, which will be of general interest. The reader may notice that some scenarios can be solved using more than one approach, but I base my suggestions here on how appropriate, flexible, and user-friendly I think the simulators are.

#### I) Nucleotide Data under Natural Selection

This scenario is commonly applied to identifying targets of positive selection in

real datasets (e.g., [31,32]). To my knowledge, there is no coalescent framework available to simulate data under natural selection whilst using Markov DNA substitution models, which may bring realistic information because not necessarily every mutation occurs at a different site in the sequence. However, two programs can be combined to quickly perform this task. First, we can simulate coalescent trees using the programs *msms* [33] or *SelSim* [34], although both tools are limited to simulation of a single locus under selection. Then, nucleotide sequences can be evolved along those trees using *Seq-Gen*. Another possibility is to apply a forward-time simulator that implements complex selection and all DNA substitution models (e.g., *SFS\_CODE*).

#### II) Coding Data with Intracodon Recombination

Simulations with recombination breakpoints that occur within codons are more realistic since these particular events occur 2/3 of the time that a recombination happens, assuming a spatially uniform distribution. Therefore, these events might exert undue influence on other parameter estimates since current analytical phylogenetic methods using codon models and recombination assume intercodon recombination. However, such effects have not been observed; in particular, dN/dS estimations were not altered (see [8]), so this should be studied further. The fastest procedure for the simulation of intracodon recombination is to directly apply the program *NetRecodon*. Alternatively, *GenomePop* can also perform this simulation under the forward approach. This scenario was applied in [35].

#### III) Amino Acid Data with Indels and Under Recombination

This is a very specific scenario, but one that can also be very interesting for readers due to its complexity and the multiple possible options for its simulation. For instance, this scenario could be useful for testing phylogenetic tree reconstruction (or recombination detection) methods from amino acid datasets that evolved under recombination (e.g., [36]). As far as I know, there is no single tool available that can simulate this scenario. My suggestion is to first simulate coalescent trees (a tree for each recombinant fragment) by the program *ms*, and then amino acid sequences with indels can be evolved on the respective trees using *INDELible*.

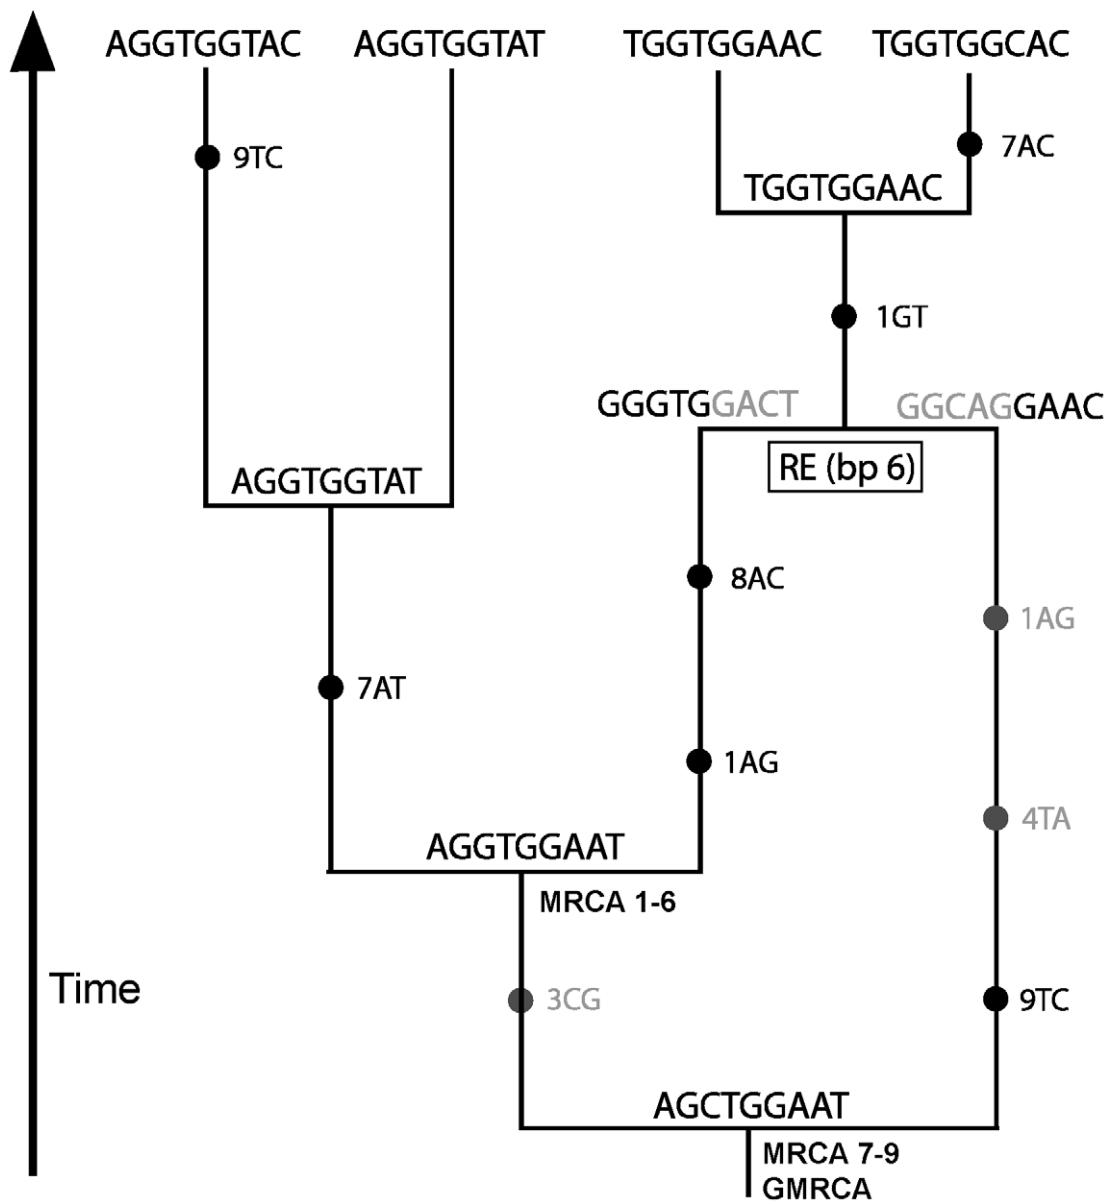

**Figure 1. Example of nucleotide evolution on the ancestral recombination graph.** Note that this ARG contains a recombination event with breakpoint at position 6. Starting from a sequence assigned to the GMRCA, substitutions (marked with black circles) occur forward in time. Non-ancestral material (material that does not reach the sample) and its substitution events are shown in grey. doi:10.1371/journal.pcbi.1002495.g001

#### IV) Long Genomic DNA Regions under Recombination

The amount of genomic data available increases rapidly and as a consequence, plenty of genetic studies focusing on large genomic regions have appeared (e.g., [37]). As expected, such studies require robust and memory-efficient simulators [10,38]. One of them is *fastsimcoal*, which allows for efficient simulations because it is based on a simplification of the standard coalescent with recombination (the sequential Markovian coalescent [SMC] algorithm [39]). Therefore, it seems to be an appropriate framework to simulate this scenario.

#### V) Coding Data under a Spatial and Temporal Range Expansion

Spatial and temporal range expansions have occurred repeatedly in the history of most species and promote genetic consequences that are different than those produced by pure demographic expansions [40]. In addition, other spatiotemporal processes, such as range contractions and range shifts (usually produced during climate changes) or long-distance dispersal events, can also affect molecular diversity [41,42]. Using *SPLATCHE2*, trees can be simulated under spatial and temporal range expansion

in a straightforward manner. Then, coding data can be simulated over those trees by *INDELible*.

#### Applications of Simulated Genetic Data

Computer simulation is a powerful tool in population genetics with a rich variety of applications. Here I show some interesting published applications.

##### 1. Hypothesis Testing

1. The effect of recombination on ancestral sequence reconstruction.

**Table 1.** The main software used to simulate genetic sequences under nucleotide, codon, and amino acid substitution models.

| Program                          | Class                            | Process                   | Substitution Model                                               | Rate Variation            | Indels | OS              | Ref.   |
|----------------------------------|----------------------------------|---------------------------|------------------------------------------------------------------|---------------------------|--------|-----------------|--------|
| SIMCOAL2                         | Coalescent                       | D, Pm, R                  | Nt: JC, K2P                                                      | No                        | No     | Linux, Win      | [65]   |
| Fastsimcoal                      | Coalescent                       | D, Pm, R                  | Nt: JC, K2P                                                      | No                        | No     | Linux, Mac, Win | [10]   |
| Serial Simcoal                   | Coalescent                       | D, Pm                     | Nt: JC, K2P                                                      | No                        | No     | SC, Mac, Win    | [66]   |
| mcoalsim                         | Coalescent                       | D, Pm, R                  | Nt: JC, K2P                                                      | G, I                      | No     | All             | [67]   |
| TREEEVOLVE                       | Coalescent                       | D, Pm, R                  | Nt: All                                                          | G                         | No     | SC, Mac         | [68]   |
| CodonRecSim                      | Coalescent                       | R                         | Cod <sup>c</sup> : GY94                                          | No                        | No     | SC, Win         | [23]   |
| Recodon/NetRecodon <sup>ab</sup> | Coalescent                       | D, Pm, R                  | Nt: All; Cod <sup>c</sup> : GY94                                 | G, I                      | No     | All             | [8,24] |
| SPLATCHE2                        | Forward, Coalescent              | D, Pm, R                  | Nt: JC, K2P                                                      | No                        | No     | Linux, Win      | [9]    |
| AQUASPLATCHE                     | Forward, Coalescent              | D, Pm                     | Nt: JC, K2P                                                      | No                        | No     | Linux, Win      | [20]   |
| GenomePop                        | Forward                          | D, Pm, R <sup>a</sup> , S | Nt: JC, GTR; Cod: MG94                                           | No                        | No     | SC, Linux, Win  | [18]   |
| SFS_CODE                         | Forward                          | D, Pm, R, S               | Nt: All; Cod: Nt <sup>d</sup>                                    | G                         | Yes    | All             | [19]   |
| SimuPop                          | Forward                          | D, Pm, R, S               | Nt: All                                                          | No                        | Yes    | All             | [21]   |
| EvoSimulator                     | Birth-death process <sup>e</sup> | D, Pm, S                  | Nt: All; Cod: Nt <sup>d</sup> ; Aa: user defined                 | User defined <sup>k</sup> | No     | SC              | [69]   |
| INDELible                        | Phylogenetic                     | -                         | Nt: All; Cod: GY94 <sup>f</sup> , EM; Aa: 15 EM <sup>g</sup>     | G, I                      | Yes    | All             | [12]   |
| EVOLVER                          | Phylogenetic                     | -                         | Nt: All; Cod: GY94; Aa: 14 EM <sup>h</sup>                       | G, I                      | No     | All             | [28]   |
| indel-Seq-Gen vs 2.0             | Phylogenetic                     | -                         | Nt: All; Cod: Nt <sup>d</sup> ; Aa: 6 EM                         | G, I                      | Yes    | All             | [27]   |
| Seq-Gen                          | Phylogenetic                     | -                         | Nt: All; Cod: Nt <sup>d</sup> ; Aa: 6 EM <sup>i</sup>            | G, I                      | No     | All             | [26]   |
| EvolveAGene 3                    | Phylogenetic                     | -                         | Cod: <i>E. coli</i> spectra                                      | No                        | Yes    | All             | [70]   |
| DAWG                             | Phylogenetic                     | -                         | Nt: All                                                          | G, I                      | Yes    | All             | [71]   |
| MySSP                            | Phylogenetic                     | -                         | Nt: All                                                          | G                         | Yes    | Win             | [72]   |
| SISSI                            | Phylogenetic                     | -                         | Nt: All; Cod: Nt <sup>dj</sup>                                   | User defined <sup>k</sup> | No     | All             | [73]   |
| ROSE                             | Phylogenetic                     | -                         | Nt: All; Aa: PAM                                                 | G                         | Yes    | SC              | [74]   |
| SIMGRAM/SIMGENOME/GSIMULATOR     | Phylogenetic                     | -                         | Nt: All; Cod: EM; Aa: Secondary structure                        | No                        | Yes    | SC              | [75]   |
| ALF                              | Phylogenetic                     | -                         | Nt: F84, HKY, TN93, GTR; Cod: GY94 and EM; Aa: 6 EM <sup>l</sup> | G, I                      | Yes    | All             | [76]   |
| SIMPROT                          | Phylogenetic                     | -                         | Aa: PAM, JTT, PMB                                                | G                         | Yes    | Linux, Win      | [77]   |
| PhyloSim                         | Phylogenetic                     | -                         | Nt: All; Cod: GY94 <sup>f</sup> , EM; Aa: 9 EM <sup>m</sup>      | G, I                      | Yes    | R               | [29]   |

“Class” includes phylogenetic (where a genealogy is already given from the user), forward, birth-death, and coalescent approaches. “Process” shows the implemented evolutionary scenarios: “D”, “Pm”, “R”, and “S” indicate demographics, population structure and migration, recombination, and extinction, respectively. “Substitution model” refers to substitution models based on nucleotide “Nt”, codon “Cod”, and amino acid “Aa” sequences; indeed, “Nt: All” indicates all nucleotide substitution models developed so far (JC, ..., GTR) and “EM” indicates empirical model. “Rate variation” indicates whether different sites can be evolved under different rates (G: gamma distribution; I: proportion of invariable sites). “Indels” indicates the consideration of insertion and deletion events. “OS” shows the availability of executable files and/or source code “SC” for different operative systems (“All” means that Macintosh, Windows, and Linux executables are available), and “R” means the R language for statistical computing. “Ref” indicates the reference of publication. Although many more software packages exist, here I have selected, from my point of view, those programs most commonly used, most user-friendly, and which implement the most diverse range of evolutionary scenarios.

<sup>a</sup>Intracodon recombination is also allowed in *NetRecodon* and *GenomePop*.

<sup>b</sup>The ARG can be exported from *NetRecodon* and can be then visualized and analyzed using *NetTest* [78].

<sup>c</sup>Under codon models,  $\omega$  can change across codons.

<sup>d</sup>Coding sequences are simulated by nucleotide substitution models, avoiding stop codons.

<sup>e</sup>EvoSimulator simulates phylogenetic histories under the birth-death model of speciation and extinction [79].

<sup>f</sup>Under codon models,  $\omega$  can change across codons and branches.

<sup>g</sup>Amino acid models implemented in *INDELible*: BLOSUM62, CpREV, DAYHOFF, DAYHOFF (DCMUT), HIVb, HIVw, JTT, JTT (DCMUT), LG, mtArt, MTMAM, mtREV, RtREV, VT, and WAG.

<sup>h</sup>Amino acid models implemented in *EVOLVER*: CpREV, CpREV64, DAYHOFF (DCMUT), DAYHOFF, GRANTHAM, JTT (DCMUT), JTT, LG, miyata, mtArt, MTMAM, mtREV24, mtZoa, WAG.

<sup>i</sup>Amino acid models implemented in *Seq-Gen*: BLOSUM62, CpREV24, JTT, mtREV, PAM, and WAG.

<sup>j</sup>Simulation of codons with structural dependency among sites.

<sup>k</sup>The rate of variation among sites can be introduced from the user.

<sup>l</sup>Amino acid models implemented in *ALF*: PAM, JTT, WAG, LG, CustomP, GCB.

<sup>m</sup>Amino acid models implemented in *PhyloSim*: CpREV, JTT, JTT (DCMUT), LG, mtArt, mtMam, mtREV24, mtZoa, WAG.

doi:10.1371/journal.pcbi.1002495.t001

Recently, Arenas and Posada [35] tested if recombination can affect ancestral sequence reconstruction (ASR). They

simulated nucleotide, codon, and amino acid data with *NetRecodon* and they observed that recombination biases the

reconstruction of ancestral sequences, regardless of the method or software used. This effect was shown as a

consequence of incorrect phylogenetic tree reconstructions when recombination is ignored [43]. Note that this effect is crucial for numerous ASR-based studies (e.g., [44]).

2. The effect of recombination on selection tests.

Tests for identifying selection (based on dN/dS) are frequently used in different species, including highly recombining viruses and bacteria (e.g., [45]). There is, however, an important pitfall of such tests in the presence of recombination. In the studies [8,23] authors simulated coding data under several heterogeneous codon models [46] and different levels of recombination. Then, they applied likelihood ratio tests (LRTs) for model choice. Results showed a weak impact of recombination on the estimation of global dN/dS but a strong effect at the local level by inflating the number of positively selected sites. Simulations were carried out using *CodonRecSim* and *NetRecodon*.

3. Testing criteria for substitution model selection.

A common step in phylogenetics consists of the statistical selection of a DNA substitution model that best fits the data [47,48]. Currently, this model selection can be performed using several criteria, namely hierarchical and dynamic LRTs, Akaike and Bayesian information criterion (AIC and BIC, respectively), and the decision-theoretic approach (DT). Although AIC and BIC showed advantages over LRTs [47], the best criterion among all other options remained unclear. Recently, Luo et al. [49] addressed this point by extensive simulations of nucleotide data (using *PAML* [28] to simulate four tree topologies and *Seq-Gen* to evolve DNA sequences under a wide set of substitution models) and coding data (using *Recodon*). Then, by statistical analysis they concluded that BIC and DT approaches favor accurate model selection.

## II. Verification of Analytical Methods

1. Validation of a method for large phylogenetic tree reconstruction.

One of the most well-established programs for phylogenetic tree reconstruction is *PHYML* [50]. As with most analytical tools, *PHYML* required thorough validation through computer simulations. In particular, 5,000 random

phylogenies were simulated according to the standard speciation process (see [51]), and then DNA sequences were evolved on those phylogenies using *Seq-Gen*. The program showed a topological accuracy similar to that from other maximum likelihood programs, but it strongly reduced computing time.

2. Validation of a method for the detection of recombinant breakpoints.

Recombination detection methods are fundamental for the analysis of genome dynamics, genetic mapping, and phylogenetic methods. As a result, a variety of methods for recombination detection exist (see [52]). One of them was recently developed by Westesson and Holmes [5] for the analysis of whole-genome alignments. For its validation, ancestral recombination graphs (ARGs) were simulated using *Recodon*, then marginal trees with identical topologies were excluded and DNA sequences were simulated on the remaining trees using *Seq-Gen*. The method accurately detected recombinant breakpoints even for genome-size datasets.

## III. Study of Complex Evolutionary Processes

1. Principal component analysis of human genetic diversity across Europe.

A controversial topic that sparked debate in recent years was the interpretation of gradients of population genetic variation across Europe derived from principal component analysis (PCA) [53–56]. Briefly, while initially Cavalli-Sforza et al. [56] interpreted principal component (PC) gradients only as a consequence of human ancestral expansions, Novembre and Stephens [53] showed that similar PC gradients may arise from diverse spatial genetic patterns under equilibrium isolation-by-distance models. Recently, François et al. [55] carried out simulations of DNA data using *SPLATCHE2* in order to mimic the Neolithic farmer expansion across Europe taking into account various levels of interbreeding between farmer and resident hunter-gatherer populations (see Figure 2). They concluded that demographic and spatial population expansions often lead to PC gradients that are perpendicular to the direction of the expansion as a consequence of the allele surfing phenomenon [57].

## IV. Estimation of Evolutionary Parameters

1. Coestimation of evolutionary parameters using approximate Bayesian computation.

Approximate Bayesian computation (ABC) is a recent and useful approach for the inference in evolutionary genetics (see [58]), based on computer simulations. It provides a robust alternative for those analyses where the likelihood function cannot be evaluated or is computationally too expensive. An interesting example studied by Wilson et al. [59] applied ABC to coestimate several evolutionary parameters (such as mutation, dN/dS, and recombination rates) from coding data of the bacteria *Campylobacter jejuni*. Although the simulator used was not published, such a scenario could be simulated using e.g., *Recodon*. In addition, Laval et al. [60] also applied an ABC-based approach to coestimate, assuming a particular model of human evolution, important historical and demographic parameters like the onset of the African expansions and the out-of-Africa migration, as well as the current and ancestral effective population sizes of Africans and non-Africans. Here the simulation of DNA data was performed using *SIMCOAL2*.

## The Future of Computer Simulations

Although current software available can simulate a wide set of evolutionary scenarios, some limitations still remain concerning computational costs and particular complex models. In some cases the computational time is crucial (e.g., ABC studies that require millions of simulations to cover a wide range of parameter space), and running simulations in parallel on a cluster can help alleviate the computational time. On the other hand, several complex scenarios that interest evolutionary biologists are still difficult to simulate. An example is the simulation of molecular evolution with dependence among sites (coevolving sites, e.g., [61]). Here, although some models were already developed (see [62]), they could not be extensively applied in simulations due to intractable computational costs derived from the calculation of diverse structural energies (like those used in [63]). Another challenging scenario is the simulation of coding data under natural selection, but where the signatures of natural selection

## A) Range expansion

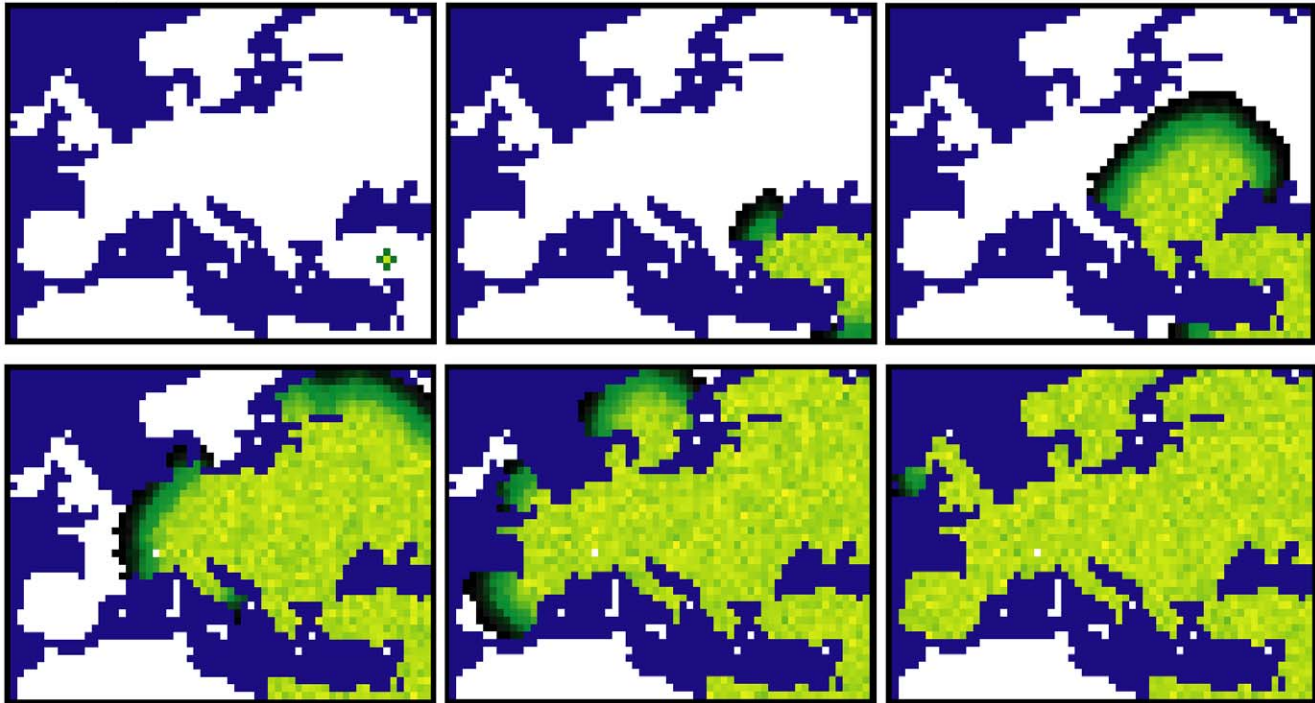

## B) Sampling locations

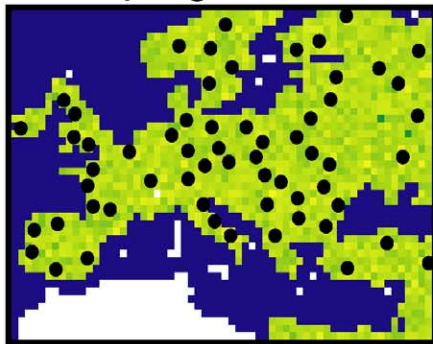

## C) Distribution of coalescent events

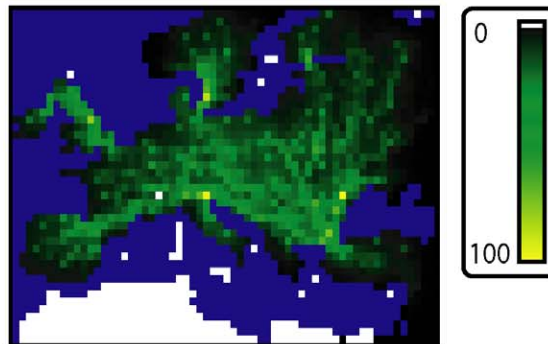

**Figure 2. Example of a simulated modern human range expansion over Europe.** (A) Snapshots of the program *SPLATCHE2* for an example of simulation of a Neolithic farmer expansion over Europe. Settings (demographic parameter values) used for this example are similar to those used in François et al. [55]. Note that the range expansion starts from the bottom-right corner of Europe. Snapshots are taken every 40 generations. White demes are empty and dark colors indicate low population densities (in particular at the front of the expansion). (B) Scheme of sampling locations used for this simulation. (C) Spatial distribution of coalescent events during the range expansion. doi:10.1371/journal.pcbi.1002495.g002

directly influence the synonymous and nonsynonymous substitutions (see [64]).

There is a permanent need of software for the simulation of molecular data due to the emergence of complex scenarios and the requirement of fast simulations. Thus,

I expect a fruitful future for this basic and applied area of research.

### Acknowledgments

I want to thank Vicky Schneider and the Editor of *PLoS Computational Biology's* Education section

for their invitation to contribute with this education article. I also want to thank Isabel Alves, Yang Liu, Rebecca Krebs-Wheaton, and William Fletcher for helpful comments. I thank three anonymous reviewers for their efforts in reviewing this study.

### References

1. Peck SL (2004) Simulation as experiment: a philosophical reassessment for biological modeling. *Trends Ecol Evol* 19: 530–534.
2. DeChaine EG, Martin AP (2006) Using coalescent simulations to test the impact of quaternary climate cycles on divergence in an alpine plant-insect association. *Evolution* 60: 1004–1013.
3. Carvajal-Rodriguez A, Crandall KA, Posada D (2006) Recombination estimation under complex evolutionary models with the coalescent composite-likelihood method. *Mol Biol Evol* 23: 817–827.
4. Arenas M, Valiente G, Posada D (2008) Characterization of reticulate networks based on the coalescent with recombination. *Mol Biol Evol* 25: 2517–2520.
5. Westesson O, Holmes I (2009) Accurate detection of recombinant breakpoints in whole-genome alignments. *PLoS Comput Biol* 5: e1000318. doi:10.1371/journal.pcbi.1000318.

6. Hill WG, Robertson A (1966) The effect of linkage on limits to artificial selection. *Genet Res* 8: 269–294.
7. Beaumont MA, Zhang W, Balding DJ (2002) Approximate Bayesian computation in population genetics. *Genetics* 162: 2025–2035.
8. Arenas M, Posada D (2010) Coalescent simulation of intracodon recombination. *Genetics* 184: 429–437.
9. Ray N, Currat M, Foll M, Excoffier L (2010) SPLATCHE2: a spatially explicit simulation framework for complex demography, genetic admixture and recombination. *Bioinformatics* 26: 2993–2994.
10. Excoffier L, Foll M (2011) fastsimcoal: a continuous-time coalescent simulator of genomic diversity under arbitrarily complex evolutionary scenarios. *Bioinformatics* 27: 1332–1334.
11. Yang Z (2006) Computational molecular evolution Oxford University Press.
12. Fletcher W, Yang Z (2009) INDELible: a flexible simulator of biological sequence evolution. *Mol Biol Evol* 26: 1879–1888.
13. Carvajal-Rodriguez A (2008) Simulation of genomes: a review. *Curr Genomics* 9: 155–159.
14. Carvajal-Rodriguez A (2010) Simulation of genes and genomes forward in time. *Curr Genomics* 11: 58–61.
15. Liu Y, Athanasiadis G, Weale ME (2008) A survey of genetic simulation software for population and epidemiological studies. *Hum Genomics* 3: 79–86.
16. Hoban S, Bertorelle G, Gaggiotti OE (2012) Computer simulations: tools for population and evolutionary genetics. *Nat Rev Genet* 13: 110–122.
17. Arenas M, Posada D (2012) Simulation of coding sequence evolution. In: Cannarozzi GM, Schneider A, eds. Codon evolution. Oxford: Oxford University Press. pp 126–132.
18. Carvajal-Rodriguez A (2008) GENOMEPOP: a program to simulate genomes in populations. *BMC Bioinformatics* 9: 223.
19. Hernandez RD (2008) A flexible forward simulator for populations subject to selection and demography. *Bioinformatics* 24: 2786–2787.
20. Neuschwander S (2006) AQUASPLATCHE: a program to simulate genetic diversity in populations living in linear habitats. *Mol Ecol Notes* 6: 583–585.
21. Peng B, Kimmel M (2005) simuPOP: a forward-time population genetics simulation environment. *Bioinformatics* 21: 3686–3687.
22. Arbiza L, Patricio M, Dopazo H, Posada D (2011) Genome-wide heterogeneity of nucleotide substitution model fit. *Genome Biol Evol* 3: 896–908.
23. Anisimova M, Nielsen R, Yang Z (2003) Effect of recombination on the accuracy of the likelihood method for detecting positive selection at amino acid sites. *Genetics* 164: 1229–1236.
24. Arenas M, Posada D (2007) Recodon: coalescent simulation of coding DNA sequences with recombination, migration and demography. *BMC Bioinformatics* 8: 458.
25. Navascues M, Depaulis F, Emerson BC (2010) Combining contemporary and ancient DNA in population genetic and phylogeographical studies. *Mol Ecol Resour* 10: 760–772.
26. Rambaut A, Grassly NC (1997) Seq-Gen: an application for the Monte Carlo simulation of DNA sequence evolution along phylogenetic trees. *Comput Appl Biosciences* 13: 235–238.
27. Strobe CL, Abel K, Scott SD, Moriyama EN (2009) Biological sequence simulation for testing complex evolutionary hypotheses: indel-Seq-Gen version 2.0. *Mol Biol Evol* 26: 2581–2593.
28. Yang Z (1997) PAML: a program package for phylogenetic analysis by maximum likelihood. *Computer Applications in the Biosciences* 13: 555–556.
29. Sipos B, Massingham T, Jordan GE, Goldman N (2011) PhyloSim - Monte Carlo simulation of sequence evolution in the R statistical computing environment. *BMC Bioinformatics* 12: 104.
30. Ihaka R, Gentleman R (1996) R: a language for data analysis and graphics. *J Comput Graph Stat* 169: 299–314.
31. Biswas S, Akey J (2006) Genomic insights into positive selection. *Trends Genet* 22: 437–446.
32. Kelley JL, Madeoy J, Calhoun JC, Swanson W, Akey JM (2006) Genomic signatures of positive selection in humans and the limits of outlier approaches. *Genome Res* 16: 980–989.
33. Ewing G, Hermisson J (2010) MSMS: a coalescent simulation program including recombination, demographic structure and selection at a single locus. *Bioinformatics* 26: 2064–2065.
34. Spencer CC, Coop G (2004) SelSim: a program to simulate population genetic data with natural selection and recombination. *Bioinformatics* 20: 3673–3675.
35. Arenas M, Posada D (2010) The effect of recombination on the reconstruction of ancestral sequences. *Genetics* 184: 1133–1139.
36. Lemey P, Lott M, Martin DP, Moulton V (2009) Identifying recombinants in human and primate immunodeficiency virus sequence alignments using quartet scanning. *BMC Bioinformatics* 10: 126.
37. Durbin RM, Altshuler DL, Abecasis GR, Bentley DR, Chakravarti A, et al. (2010) A map of human genome variation from population-scale sequencing. *Nature* 467: 1061–1073.
38. Marjoram P, Wall JD (2006) Fast “coalescent” simulation. *BMC Genet* 7: 16.
39. McVean GA, Cardin NJ (2005) Approximating the coalescent with recombination. *Philos Trans R Soc Lond B Biol Sci* 360: 1387–1393.
40. Excoffier L, Foll M, Petit RJ (2009) Genetic consequences of range expansions. *Annu Rev Ecol Evol Syst* 40: 481–501.
41. Arenas M, Ray N, Currat M, Excoffier L (2012) Consequences of range contractions and range shifts on molecular diversity. *Mol Biol Evol* 29: 207–218.
42. Ray N, Excoffier L (2010) A first step towards inferring levels of long-distance dispersal during past expansions. *Mol Ecol Resour* 10: 902–914.
43. Schierup MH, Hein J (2000) Consequences of recombination on traditional phylogenetic analysis. *Genetics* 156: 879–891.
44. Arenas M, Posada D (2010) Computational design of centralized HIV-1 genes. *Curr HIV Res* 8: 613–621.
45. Bozek K, Lengauer T (2010) Positive selection of HIV host factors and the evolution of lentivirus genes. *BMC Evol Biol* 10: 186.
46. Yang Z, Nielsen R, Goldman N, Pedersen A-MK (2000) Codon-substitution models for heterogeneous selection pressure at amino acid sites. *Genetics* 155: 431–449.
47. Posada D, Buckley TR (2004) Model selection and model averaging in phylogenetics: advantages of Akaike Information Criterion and Bayesian approaches over likelihood ratio tests. *Syst Biol* 53: 793–808.
48. Sullivan J, Joyce P (2005) Model selection in phylogenetics. *Annu Rev Ecol Evol Syst* 36: 445–466.
49. Luo A, Qiao H, Zhang Y, Shi W, Ho SY, et al. (2010) Performance of criteria for selecting evolutionary models in phylogenetics: a comprehensive study based on simulated datasets. *BMC Evol Biol* 10: 242.
50. Guindon S, Gascuel O (2003) A simple, fast, and accurate algorithm to estimate large phylogenies by maximum likelihood. *Syst Biol* 52: 696–704.
51. Kuhner MK, Felsenstein J (1994) A simulation comparison of phylogeny algorithms under equal and unequal evolutionary rates. *Molecular Biol Evol* 11: 459–468.
52. Posada D (2002) Evaluation of methods for detecting recombination from DNA sequences: empirical data. *Mol Biol Evol* 19: 708–717.
53. Novembre J, Stephens M (2008) Interpreting principal component analyses of spatial population genetic variation. *Nat Genet* 40: 646–649.
54. Novembre J, Stephens M (2010) Response to Cavalli-Sforza interview [Human Biology 82(3):245–266 (June 2010)]. *Hum Biol* 82: 469–470.
55. François O, Currat M, Ray N, Han E, Excoffier L, et al. (2010) Principal component analysis under population genetic models of range expansion and admixture. *Mol Biol Evol* 27: 1257–1268.
56. Cavalli-Sforza LL, Menozzi P, Piazza A (1994) The history and geography of human genes. Princeton, New Jersey: Princeton University Press.
57. Excoffier L, Ray N (2008) Surfing during population expansions promotes genetic revolutions and structuration. *Trends Ecol Evol* 23: 347–351.
58. Beaumont MA (2010) Approximate Bayesian computation in evolution and ecology. *Annu Rev Ecol Evol Syst* 41: 379–405.
59. Wilson DJ, Gabriel E, Leatherbarrow AJ, Cheesbrough J, Gee S, et al. (2009) Rapid evolution and the importance of recombination to the gastroenteric pathogen *Campylobacter jejuni*. *Mol Biol Evol* 26: 385–397.
60. Laval G, Patin E, Barreiro LB, Quintana-Murci L (2010) Formulating a historical and demographic model of recent human evolution based on resequencing data from noncoding regions. *PLoS ONE* 5: e10284. doi:10.1371/journal.pone.0010284.
61. Wang M, Kapralov MV, Anisimova M (2011) Coevolution of amino acid residues in the key photosynthetic enzyme Rubisco. *BMC Evol Biol* 11: 266.
62. Bastolla U, Porto M, Roman HE, Vendruscolo M (2007) Structural approaches to sequence evolution. Berlin, Heidelberg: Springer.
63. Arenas M, Villaverde MC, Sussman F (2009) Prediction and analysis of binding affinities for chemically diverse HIV-1 PR inhibitors by the modified SAFE\_p approach. *J Comput Chem* 30: 1229–1240.
64. Kryazhimskiy S, Plotkin JB (2008) The population genetics of dN/dS. *PLoS Genet* 4: e1000304. doi:10.1371/journal.pgen.1000304.
65. Excoffier L, Novembre J, Schneider S (2000) SIMCOAL: a general coalescent program for the simulation of molecular data in interconnected populations with arbitrary demography. *J Heredity* 91: 506–509.
66. Anderson CN, Ramakrishnan U, Chan YL, Hadly EA (2005) Serial SimCoal: a population genetics model for data from multiple populations and points in time. *Bioinformatics* 21: 1733–1734.
67. Ramos-Onsins SE, Mitchell-Olds T (2007) MlcoalSim: multilocus coalescent simulations. *Evol Bioinform Online* 3: 41–44.
68. Grassly NC, Harvey PH, Holmes EC (1999) Population dynamics of HIV-1 inferred from gene sequences. *Genetics* 151: 427–438.
69. Beiko RG, Charlebois RL (2007) A simulation test bed for hypotheses of genome evolution. *Bioinformatics* 23: 825–831.
70. Hall BG (2008) Simulating DNA coding sequence evolution with EvolveAGene 3. *Mol Biol Evol* 25: 688–695.
71. Cartwright RA (2005) DNA assembly with gaps (Dawg): simulating sequence evolution. *Bioinformatics* 21 Suppl 3: iii31–38.
72. Rosenberg MS (2005) MySSP: Non-stationary evolutionary sequence simulation, including indels. *Evol Bioinform Online* 1: 81–83.
73. Gesell T, von Haeseler A (2006) In silico sequence evolution with site-specific interactions along phylogenetic trees. *Bioinformatics* 22: 716–722.
74. Stoye J, Evers D, Meyer F (1998) Rose: generating sequence families. *Bioinformatics* 14: 157–163.

75. Varadarajan A, Bradley RK, Holmes IH (2008) Tools for simulating evolution of aligned genomic regions with integrated parameter estimation. *Genome Biol* 9: R147.
76. Dalquen DA, Anisimova M, Gonnet GH, Dessimoz C (2012) ALF—a simulation framework for genome evolution. *Mol Biol Evol* 29: 1115–1123.
77. Pang A, Smith AD, Nuin PA, Tillier ER (2005) SIMPROT: using an empirically determined indel distribution in simulations of protein evolution. *BMC Bioinformatics* 6: 236.
78. Arenas M, Patricio M, Posada D, Valiente G (2010) Characterization of phylogenetic networks with NetTest. *BMC Bioinformatics* 11: 268.
79. Raup DM, Gould SJ, Schopf TJM, Simberloff DS (1973) Stochastic models of phylogeny and the evolution of diversity. *J Geol* 81: 525–542.
80. Epperson BK, McRae BH, Scribner K, Cushman SA, Rosenberg MS, et al. (2010) Utility of computer simulations in landscape genetics. *Mol Ecol* 19: 3549–3564.
81. Peng B, Amos CI, Kimmel M (2007) Forward-time simulations of human populations with complex diseases. *PLoS Genet* 3: e47. doi:10.1371/journal.pgen.0030047.
82. Calafell F, Grigorenko EL, Chikhanian AA, Kidd KK (2001) Haplotype evolution and linkage disequilibrium: a simulation study. *Hum Hered* 51: 85–96.
83. Jones TC, Laughlin TF (2010) PopGen fishbowl: a free online simulation model of microevolutionary processes. *Am Biol Teach* 72: 100–103.
84. Coombs JA, Letcher BH, Nislow KH (2010) Pedagog: software for simulating eco-evolutionary population dynamics. *Mol Ecol Resour* 10: 558–563.
85. Padhukasahasram B, Marjoram P, Wall JD, Bustamante CD, Nordborg M (2008) Exploring population genetic models with recombination using efficient forward-time simulations. *Genetics* 178: 2417–2427.
86. Nordborg M (2007) Coalescent theory. In: Balding DJ, Bishop M, Cannings C, eds. *Handbook of statistical genetics*. Third edition. Chichester, UK: John Wiley & Sons, Ltd. pp 843–877.
87. Wakeley J (2008) *Coalescent Theory: An Introduction*. Greenwood Village, Colorado: Roberts and Company Publishers.
88. Slatkin M (2001) Simulating genealogies of selected alleles in a population of variable size. *Genet Res* 78: 49–57.
89. Hudson RR (1998) Island models and the coalescent process. *Mol Ecol* 7: 413–418.
90. Hudson RR (1983) Properties of a neutral allele model with intragenic recombination. *Theor Popul Biol* 23: 183–201.
91. Hudson RR, Kaplan NL (1988) The coalescent process in models with selection and recombination. *Genetics* 120: 831–840.
